# Supplementary material
Source: publisher site journal article supplement (https://www.spandidos-publications.com/6082/downloadSupplementary)

Figure S1. Study design. NSCLC, non-small cell lung cancer; CTC, circulating tumor cell; ICI, immune checkpoint inhibitors; PC, platinum-containing; PD-L1, programmed cell death-ligand 1.

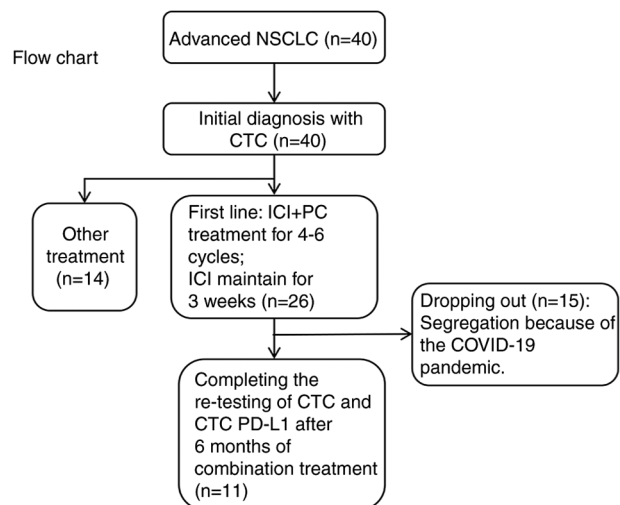

Supplement: Supplementary file 1 [file downloadSupplementary]
